# Supplementary material for: Clinical Assessment of Specifically Formulated Creams for Oncology: Case Series
Source: Preprints.org preprint supplement (doi:10.20944/preprints202303.0035.v1), 2023-03-02
Supplement: Supplementary file 1 [file supplementary]

## Sheet: Full1
	RESULTADOS HYDROSKIN-ICO
	Datos en bruto
	Crema	TipoRT	Group	Elast-Basal	Hydrat-Basal	Melan-Basal	Erythema-Basal	Elast-Initial	Hydrat-Initial	Melan-Initial	Erythema-Initial	Elast-8weeks	Hydrat-8weeks	Melan-8weeks	Erythema-8weeks	Elast-14weeks	Hydrat-14weeks	Melan-14weeks	Erythema-14weeks	Elast-End	Hydrat-End	Melan-End	Erythema-End	Elast-post7days	Hydrat-post7days	Melan-post7days	Erythema-post7days	Elast-post14days	Hydrat-post14days	Melan-post14days	Eryihtema-post14days
	HidrUltra	Hipofracc	HUH	77.7	38.7	15.3	21.6	64.8	39.6	9.15	22.8	54.3	40.8	6.6	27	52	41.7	8.1	33	53.7	34.8	6.9	33.1	52.7	37.5	7.6	30.6	53	34.9	6.8	25.8
		Normofracc	HUN	77.7	38.7	15.3	21.6	80	37.15	7.55	16.8	71.5	32.15	8.25	24.9	71.5	32.15	8.25	24.9	71.5	30.7	9.9	33.8	61.5	23.75	13.15	37.5	68.5	26.4	18.15	40.6
	HidrRich	Hipofracc	HRH	78.4	31.12	5.22	13.9	67.5	29.4	0.55	15.25	64.4	34.15	6.5	17.25	54	29.7	0.15	19.5	56.5	32.25	1	20.75	65	35	0.8	21.8	68.25	31.75	1.55	25.05
		Normofracc	HRN	78.4	31.12	5.22	13.9	65.3	37.8	4.9	19.5	64.3	38.5	5.3	21.4	69	30.7	7.6	26.4	63	32.7	6.8	28.4	60	31.2	3.8	33.8	64	29.3	7.1	32.4
	RadioSk	Hipofracc	RSH	72.5	35.06	16.5	19.8	70.7	33.4	15.7	22.5	73.2	31.6	14.3	28.3	76.7	29.1	15.2	29.7	64.2	40.5	14.7	35
		Normofracc	RSN	72.5	35.06	16.5	19.8	66.6	35.6	13.5	17	72.6	33.75	10.6	20.7	62	38.7	8.85	20.4	66.2	33.25	8.15	30.25
	Control	Hipofracc	OH
		Normofracc	ON
	Sobre la zona de tratamiento
Id	Crema	Dolor-ini	Picor-ini	Ardor-ini	afectAVD-ini	AfectSueño-ini	Hipersens-ini	Dudas-ini	Dolor-8s	Picor-8s	Ardor-8s	afectAVD-8s	AfectSueño-8s	Hipersens-8s	Dudas-8s	Dolor-14s	Picor-14s	Ardor-14s	afectAVD-14s	AfectSueño-14s	Hipersens-14s	Dudas-14s	Dolor-fin	Picor-fin	Ardor-fin	afectAVD-fin	AfectSueño-fin	Hipersens-fin	Dudas-fin	Dolor-post7d	Picor-post7d	Ardor-post7d	afectAVD-post7d	AfectSueño-post7d	Hipersens-post7d	Dudas-post7d	Dolor-post14d	Picor-post14d	Ardor-post14d	afectAVD-post14d	AfectSueño-post14d	Hipersens-post14d	Dudas-post14d	Comentarios
1	HU	0	0	0	0	0	0	0	0	0	0	0	0	0	0	0	0	0	0	0	0	0	2	2	2	1	1	0	0	2	2	2	0	0	0	0	0	1	1	0	0	0	0
2	HU	0	0	0	0	0	0	0	0	1	0	0	0	0	0	1	1	1	0	0	1	0	1	1	1	0	0	1	0	1	1	0	0	1	0	0	0	0	0	0	0	0	0	Blastoestimulina en axila a partir de sesión 20
3	HU	0	0	0	0	0	0	0	0	1	1	0	0	1	0	1	1	1	0	0	1	0	1	1	1	0	0	1	0	1	1	1	0	0	1	0								Dolor en pezón
4	HU	0	0	0	0	0	1	0	0	1	1	0	0	1	0	0	0	0	0	0	1	0	0	0	0	0	0	1	0	0	0	0	0	0	0	0
5	HU	0	0	0	0	0	1	0	1	2	0	0	1	1	0	1	2	1	0	1	2	0	1	2	1	0	1	2	0	1	2	1	0	0	1	0	1	1	2	0	0	1	0	Sofocaciones y movilidad en hombro mas limitada
6	HR	0	1	0	0	0	0	0	1	1	1	0	1	1	0	1	1	1	0	0	1	0	1	1	1	1	0	1	0	1	2	1		0	0	0								Molestias en pezón y axila
7	HR	0	0	0	0	0	0	0	0	0	0	0	0	0	0	0	0	0	0	0	0	0	0	1	0	0	0	0	0	1	2	1	0	0	1	0	0	1	0	0	0	0	0
8	HR	0	0	0	0	0	0	0	0	1	0	0	0	0	0	0	1	0	0	0	0	0	0	1	0	0	0	0	0	0	1	0	0	0	0	0	0	0	0	0	0	0	0
9	HR	0	0	0	0	0	0	0	0	0	0	0	0	0	0	0	0	0	0	0	0	0	0	0	0	0	0	0	0	0	0	0	0	0	0	0
10	HR	0	0	0	0	0	0	0	0	0	0	0	0	0	0	0	2	1	0	1	1	0	2	2	1	0	0	0	0	1	0	1	0	0	1	0	0	0	1	0	0	0	0	Prurito en casote, pezón y pliegue inframamario
11	RS	0	0	0	0	0	0	0	0	0	1	0	0	0	0	0	0	1	0	0	0	0	1	1	1	0	1	1	0
12	RS	0	0	0	0	0	0	0	1	0	0	0	0	0	0	1	1	0	0	0	1	0	1	1	0	0	0	1	0	2	1	1	1	1	1	0	2	1	1	1	1	1	0	Molestias en pezón y axila
13	RS	0	0	0	0	0	0	0	0	0	0	0	0	0	0	0	0	0	0	0	0	0	0	0	0	0	0	0	0	1	0	0	0	0	0	0
14	RS	0	0	0	0	0	0	0	0	1	1	0	0	0	0	0	0	0	0	0	0	0	0	1	1	0	0	0	0	1	2	1	0	0	0	0	1	2	1	0	0	0	0
15	RS	0	0	0	0	0	0	0	0	0	0	0	0	0	0	1	1	0	0	0	0	0	1	1	0	0	0	0	0	2	1	0	0	0	0	0
Claves:	ninguno	0
	poco	1
	bastante	2
